# Supplementary material for: Preparation and Characterization of Cellulose Nanocrystals from Bamboos and Their Application in Cassava Starch-Based Film
Source: MDPI journal article supplement (doi:10.3390/polym15122622), 2023-06-08
Supplement: s1 [file s1]

## Supplementary data

### Preparation and Characterization of Cellulose Nanocrystals from Bamboos and Its Application in Cassava Starch-Based Film

Parichat Thipchai, Winita Punyodom, Kittisak Jantanasakulwong, Sarinthip Thanakkasaranee, Sasina Hinmo, Kanticha Pratinthong, Gopinath Kasi, Pornchai Rachtanapun\*

**Table S1.** The raw data for chemical constituent calculation.

| Chemical constituents (%) | Samples | 1     | 2     | 3     | AVG   | SD   |
|---------------------------|---------|-------|-------|-------|-------|------|
| Holocellulose (%)         | TSG     | 70.26 | 70.26 | 71.26 | 70.59 | 0.58 |
|                           | DSM     | 73.95 | 74.95 | 75.02 | 74.64 | 0.60 |
|                           | BL      | 72.36 | 73.96 | 73.00 | 73.11 | 0.81 |
|                           | BS      | 63.48 | 64.58 | 65.25 | 64.44 | 0.89 |
| $\alpha$ -cellulose (%)   | TSG     | 40.51 | 39.97 | 40.22 | 40.23 | 0.27 |
|                           | DSM     | 42.05 | 43.53 | 42.01 | 42.53 | 0.86 |
|                           | BL      | 41.04 | 41.05 | 43.01 | 41.70 | 1.13 |
|                           | BS      | 36.85 | 38.42 | 37.05 | 37.44 | 0.85 |
| Hemicellulose (%)         | TSG     | 29.75 | 30.29 | 31.04 | 30.36 | 0.65 |
|                           | DSM     | 31.90 | 31.42 | 33.01 | 32.11 | 0.81 |
|                           | BL      | 31.32 | 32.91 | 29.99 | 31.40 | 1.46 |
|                           | BS      | 26.63 | 26.17 | 28.19 | 27.00 | 1.06 |
| Lignin (%)                | TSG     | 23.21 | 22.34 | 22.02 | 22.52 | 0.61 |
|                           | DSM     | 22.92 | 23.22 | 24.02 | 23.39 | 0.57 |
|                           | BL      | 29.35 | 28.22 | 29.00 | 28.86 | 0.58 |
|                           | BS      | 24.37 | 25.15 | 23.79 | 24.44 | 0.68 |
| Extractive (%)            | TSG     | 2.99  | 3.20  | 3.06  | 3.08  | 0.11 |
|                           | DSM     | 4.04  | 4.15  | 4.78  | 4.32  | 0.40 |
|                           | BL      | 3.24  | 3.12  | 3.09  | 3.15  | 0.08 |
|                           | BS      | 5.06  | 4.93  | 4.82  | 4.94  | 0.12 |
| Ash (%)                   | TSG     | 3.60  | 3.02  | 3.73  | 3.45  | 0.38 |
|                           | DSM     | 1.89  | 1.77  | 2.00  | 1.89  | 0.12 |
|                           | BL      | 2.06  | 2.02  | 1.92  | 2.00  | 0.07 |
|                           | BS      | 2.11  | 2.48  | 2.30  | 2.30  | 0.19 |

**Table S2.** Peak analysis data for XRD calculation of crystallite sizes of cellulose and CNC from four bamboo species.

| Samples       | Peak position (2theta) | FWHM | Beta | Cos Theta | Crystallite sizes |
|---------------|------------------------|------|------|-----------|-------------------|
| Cellulose-TSG | 22.02                  | 2.95 | 0.05 | 0.98      | 2.86              |
| Cellulose-DSM | 22.14                  | 2.98 | 0.05 | 0.98      | 2.84              |
| Cellulose-BL  | 21.68                  | 4.00 | 0.07 | 0.98      | 2.11              |
| Cellulose-BS  | 21.66                  | 3.61 | 0.06 | 0.98      | 2.34              |
| CNC-TSG       | 21.88                  | 6.71 | 0.12 | 0.98      | 1.26              |
| CNC-DSM       | 21.76                  | 5.15 | 0.09 | 0.98      | 1.64              |
| CNC-BL        | 21.27                  | 5.61 | 0.10 | 0.98      | 1.51              |
| CNC-BS        | 21.76                  | 6.24 | 0.11 | 0.98      | 1.35              |
